# Supplementary material
Source: PubMed Central journal article supplement (PMC4788384)
Supplement: NIHMS763050-supplement-Oversight.pdf [file NIHMS763050-supplement-Oversight.pdf]

January 15, 2016

Clifton M. Carey, PhD  
Professor, Director of Translational Research  
University of Colorado Anschutz Medical Campus  
School of Dental Medicine  
Department of Craniofacial Biology  
Aurora, CO 80045

Dear Dr. Carey,

With regard to the recently published article A. Gonzalez-Bonet, G. Kaufman, Y. Yang, C. Wong, A. Jackson, G. Huyang, R. Bowen and J. Sun: "Preparation of Dental Resins Resistant to Enzymatic and Hydrolytic Degradation in Oral Environments" *Biomacromolecules* 2015; 16(10): 3381-8, the authors inadvertently omitted the acknowledgement of funding from grant R01 DE021391, NIH/NIDCR (09/15/2010 – 08/31/2014), "Effects of Biofilm Activities and Dental Resin Composite Compositions on the Development of Secondary Caries". We apologize for this oversight. A notification of the omission has also been sent to the Editor of *Biomacromolecules* journal.

Sincerely,



Gary E. Schumacher, DDS, MS  
Principal Investigator, Grant DE021391 (2010-2014)
