# Supplementary material
Source: PubMed Central journal article supplement (PMC4788384)
Supplement: NIHMS763050-supplement-S1_-_S3.pdf [file NIHMS763050-supplement-S1_-_S3.pdf]

## **SUPPLEMENTARY INFORMATION**

### **Preparation of Dental Resins Resistance to Enzymatic and Hydrolytic Degradation in Oral Environments**

*Andres Gonzalez-Bonet, Gili Kaufman, Yin Yang, Christopher Wong, Abigail Jackson, George Huyang, Rafael Bowen and Jirun Sun\**

Dr. Anthony Volpe Research Center, American Dental Association Foundation, National Institute of Standards and Technology, Gaithersburg, MD 20899, USA

[jsun@nist.gov](mailto:jsun@nist.gov)

**1,12-bis(4-vinylphenyl)-2,5,8,11-tetraoxadodecane (TEG-DVBE).**

a)

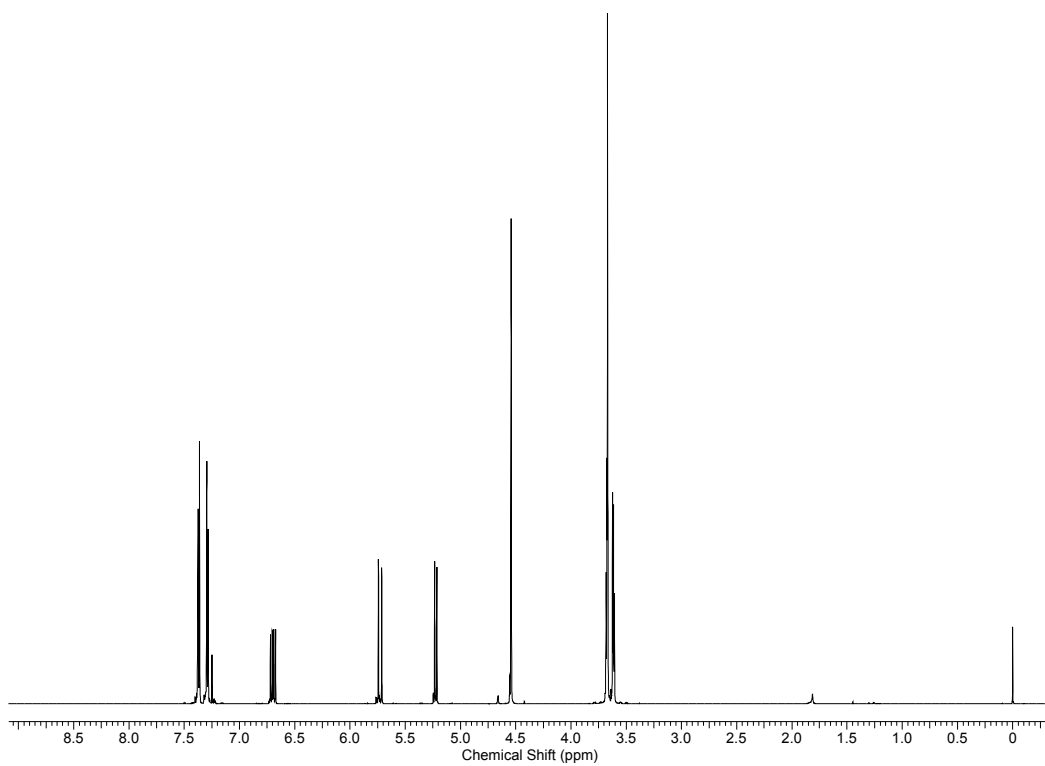

b)

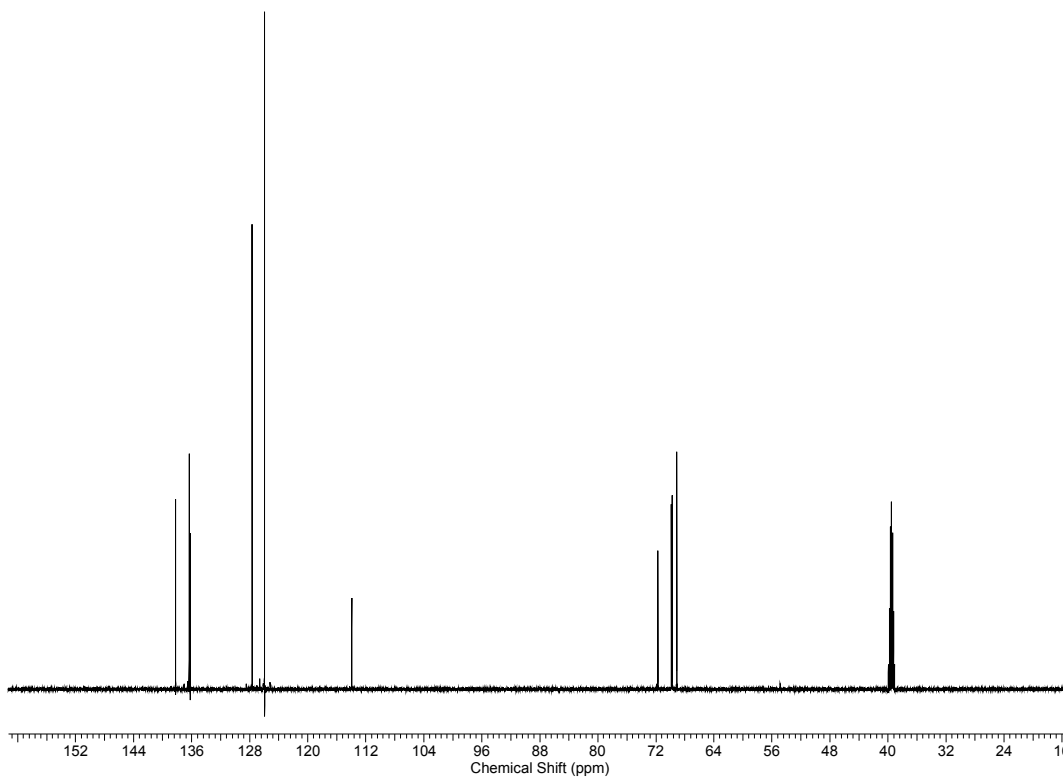

**Figure S1.** a)  $^1\text{H}$  NMR in  $\text{CDCl}_3$  and b)  $^{13}\text{C}$  NMR in  $\text{DMSO}-d_6$  spectra of **TEG-DVBE** at 298 K.

**(2R,3R)-1,4-bis((4-vinylbenzyl)oxy)butane-2,3-diol (E-DVBE).**

a)

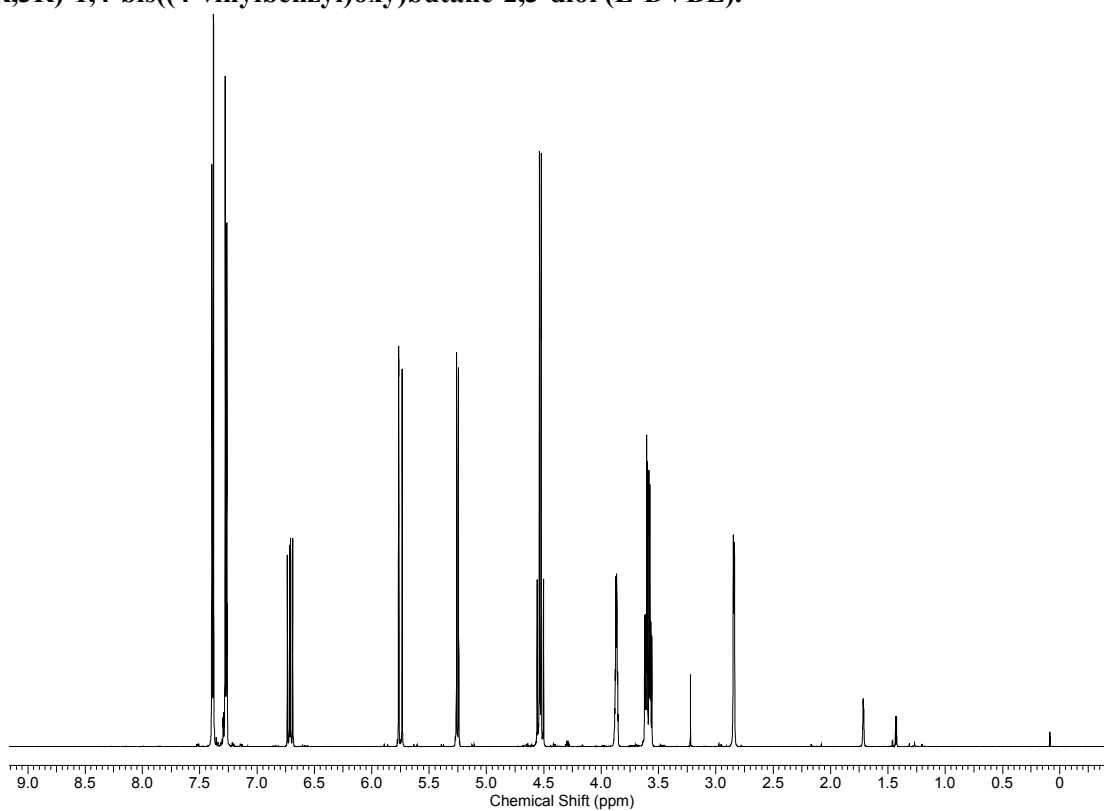

b)

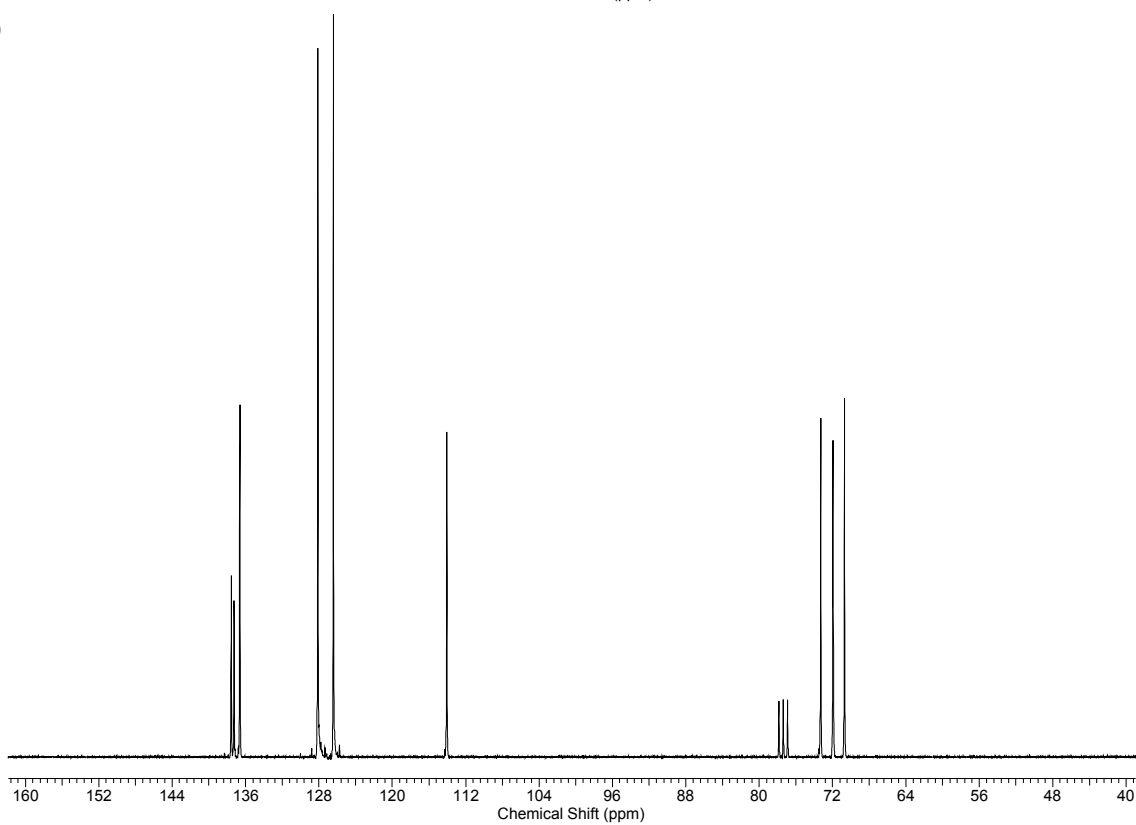

**Figure S2.** a) <sup>1</sup>H NMR and b) <sup>13</sup>C NMR spectra of **E-DVBE** in CDCl<sub>3</sub> at 298 K.

**Sodium *N*-(2-hydroxy-3-((4-vinylbenzyl)oxy)propyl)-*N*-(*p*-tolyl)glycinate (NTG-VBGE).**

a)

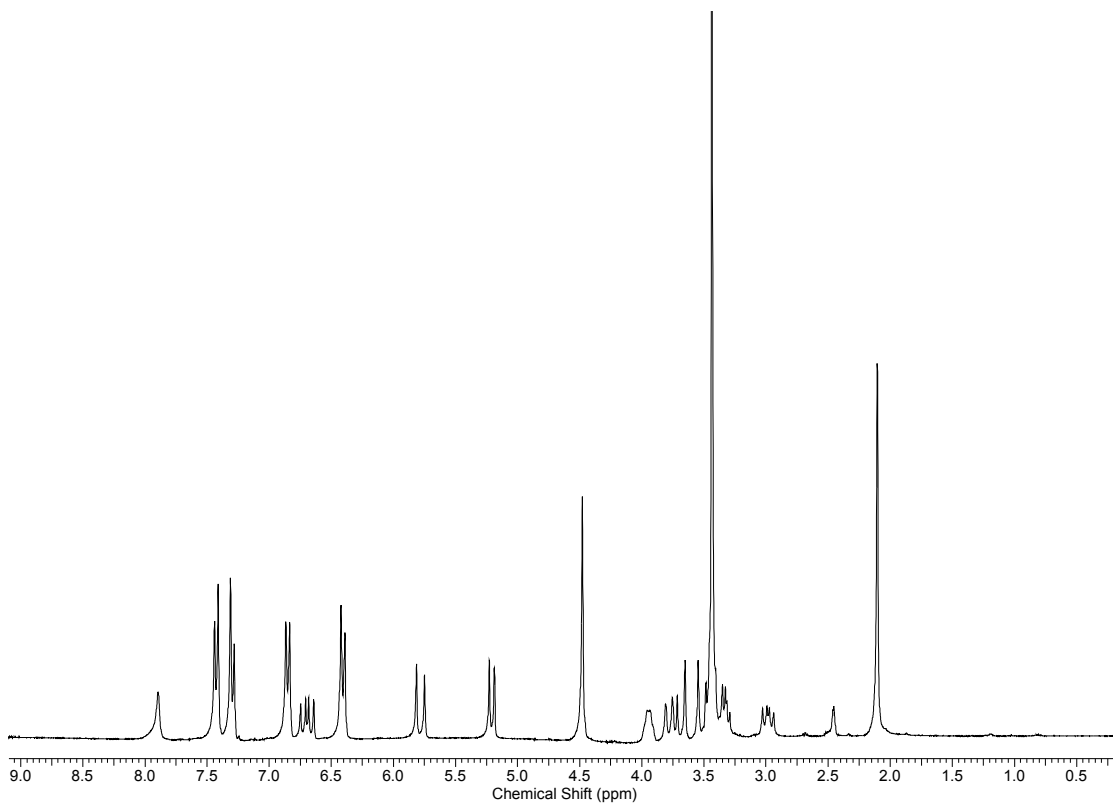

b)

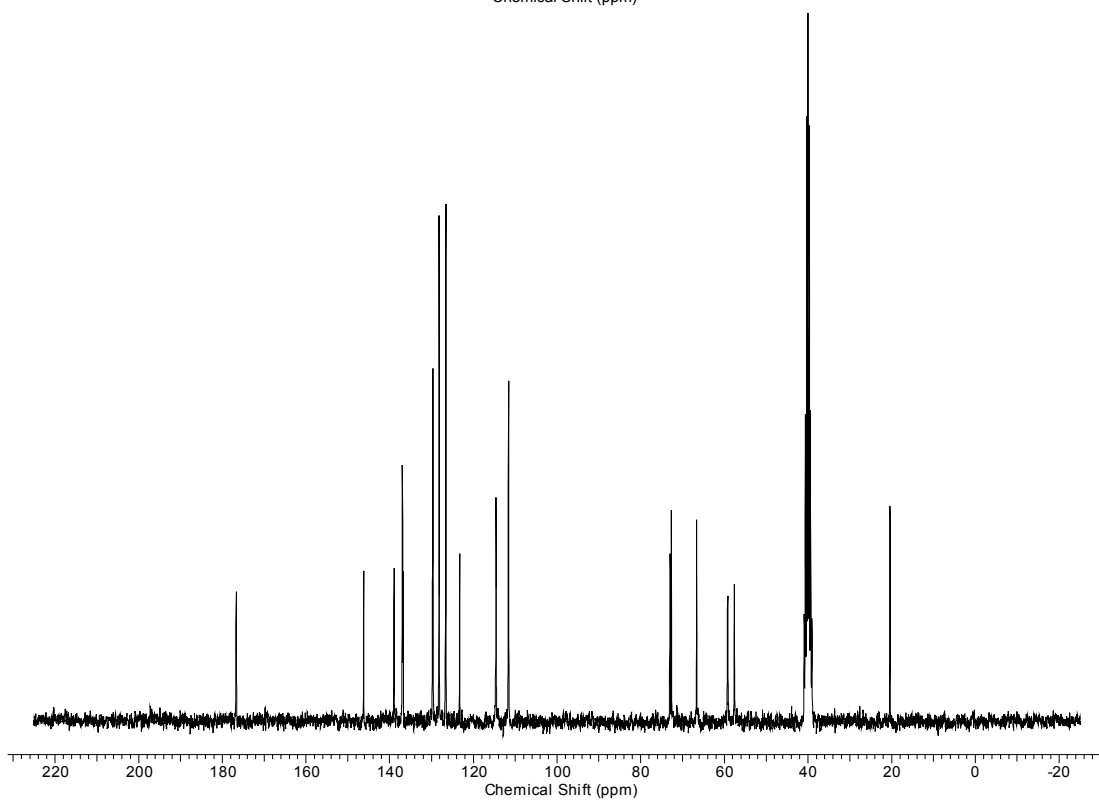

**Figure S3.** a)  $^1\text{H}$  NMR and b)  $^{13}\text{C}$  NMR spectra of NTG-VBGE in  $\text{DMSO-}d_6$  at 298 K.
